# Supplementary material for: A novel immune-related lncRNA pair signature for prognostic prediction and immune response evaluation in gastric cancer: a bioinformatics and biological validation study
Source: Cancer Cell Int. 2022 Feb 10;22:69. doi: 10.1186/s12935-022-02493-2 (PMC8832759; doi:10.1186/s12935-022-02493-2)
Supplement: Supplementary file 1 — Additional file 1: Table S1. The immune related pathway and genes. [file 12935_2022_2493_MOESM1_ESM.xlsx]

## Sheet: Sheet1
Table S1. The immune related pathway and genes.
Pathway	Gene ID	Gene symbol	The number of genes
Antigen Processing and Presentation	ENSG00000160862;ENSG00000166710;ENSG00000179218;ENSG00000127022;ENSG00000158477;ENSG00000158485;ENSG00000158481;ENSG00000158473;ENSG00000158488;ENSG00000010610;ENSG00000153563;ENSG00000172116;ENSG00000019582;ENSG00000118260;ENSG00000164733;ENSG00000196188;ENSG00000163131;ENSG00000158869;ENSG00000104870;ENSG00000167004;ENSG00000010704;ENSG00000206503;ENSG00000234745;ENSG00000204525;ENSG00000204257…	AZGP1;B2M;CALR;CANX;CD1A;CD1B;CD1C;CD1D;CD1E;CD4;CD8A;CD8B;CD74;CREB1;CTSB;CTSE;CTSS;FCER1G;FCGRT;PDIA3;HFE;HLA-A;HLA-B;HLA-C;HLA-DMA;HLA-DMB;HLA-DOA;HLA-DOB;HLA-DPA1;HLA-DPB1;HLA-DQA1;HLA-DQA2;HLA-DQB1;HLA-DRA;HLA-DRB1;HLA-DRB5;HLA-E;HLA-F;HLA-G;MR1;HSPA1A;HSPA1B;HSPA1L;HSPA2;HSPA4;HSPA5;HSPA6;HSPA8;HSP90AA1;HSP90AB1;ICAM1;IFNA1;IFNA2;IFNA4;IFNA5;IFNA6;IFNA7;IFNA8;IFNA10;IFNA13;IFNA14;IFNA16;IFN…	135
Antimicrobials	ENSG00000105697;ENSG00000124102;ENSG00000164047;ENSG00000163736;ENSG00000143954;ENSG00000145824;ENSG00000161921;ENSG00000124107;ENSG00000169245;ENSG00000138755;ENSG00000163735;ENSG00000169248;ENSG00000124875;ENSG00000163739;ENSG00000107562;ENSG00000156234;ENSG00000081041;ENSG00000163737;ENSG00000143184;ENSG00000163734;ENSG00000176797;ENSG00000181374;ENSG00000108702;ENSG00000164825;ENSG00000108700…	HAMP;PI3;CAMP;PPBP;REG3G;CXCL14;CXCL16;SLPI;CXCL10;CXCL9;CXCL5;CXCL11;CXCL6;CXCL1;CXCL12;CXCL13;CXCL2;PF4;XCL1;CXCL3;DEFB103A;CCL13;CCL1;DEFB1;CCL8;ELANE;DEFB103B;DEFA3;DEFA1;TMSB10;DEFA6;DEFA5;DEFA4;LCN2;LCN1;COLEC10;BPI;S100A9;S100A8;DCD;LCN6;S100A12;HTN3;LCN8;CCR10;CELA1;DEFB106A;PENK;MMP12;LEAP2;SFTPD;LCN9;PTGDS;TMSB4X;PGLYRP1;ZC3HAV1;TMSB15A;S100B;S100A13;S100A6;DEFB119;DEFB107A;DEFB105A;SER…	463
BCR Signaling Pathway	ENSG00000105369;ENSG00000007312;ENSG00000254087;ENSG00000165025;ENSG00000010671;ENSG00000095585;ENSG00000134215;ENSG00000141968;ENSG00000160293;ENSG00000136238;ENSG00000128340;ENSG00000169750;ENSG00000138814;ENSG00000107758;ENSG00000120910;ENSG00000221823;ENSG00000188386;ENSG00000166869;ENSG00000102908;ENSG00000131196;ENSG00000101096;ENSG00000072736;ENSG00000100968;ENSG00000174775;ENSG00000133703…	CD79A;CD79B;LYN;SYK;BTK;BLNK;VAV3;VAV1;VAV2;RAC1;RAC2;RAC3;PPP3CA;PPP3CB;PPP3CC;PPP3R1;PPP3R2;CHP2;NFAT5;NFATC1;NFATC2;NFATC3;NFATC4;HRAS;KRAS;NRAS;FOS;JUN;CARD11;BCL10;MALT1;CHUK;IKBKB;IKBKG;NFKB1;RELA;NFKBIA;NFKBIB;NFKBIE;CD81;CD19;CR2;PIK3R5;PIK3R1;PIK3R2;PIK3R3;PIK3CA;PIK3CB;PIK3CD;PIK3CG;AKT3;AKT1;AKT2;GSK3B;INPP5D;CD22;CD72;PTPN6;LILRB3;FCGR2B;RASGRP3;PLCG2;PRKCB;IFITM1	64
Chemokines	ENSG00000125730;ENSG00000106804;ENSG00000164047;ENSG00000108702;ENSG00000172156;ENSG00000181374;ENSG00000276409;ENSG00000275718;ENSG00000275152;ENSG00000102970;ENSG00000275385;ENSG00000172724;ENSG00000108691;ENSG00000115009;ENSG00000137077;ENSG00000102962;ENSG00000274736;ENSG00000106178;ENSG00000131142;ENSG00000006606;ENSG00000213927;ENSG00000151882;ENSG00000277632;ENSG00000276085;ENSG00000275302…	C3;C5;CAMP;CCL1;CCL11;CCL13;CCL14;CCL15;CCL16;CCL17;CCL18;CCL19;CCL2;CCL20;CCL21;CCL22;CCL23;CCL24;CCL25;CCL26;CCL27;CCL28;CCL3;CCL3L3;CCL4;CCL4L2;CCL5;CCL7;CCL8;CKLF;CMA1;CTSG;CX3CL1;CXCL1;CXCL10;CXCL11;CXCL12;CXCL13;CXCL14;CXCL16;CXCL17;CXCL2;CXCL3;CXCL5;CXCL6;CXCL9;CYR61;DEFA1;DEFA3;DEFA5;DEFB1;DEFB103A;DEFB104A;EDN1;EDN2;EDN3;FGF10;FGF2;HTN3;LECT2;PF4;PF4V1;PLAU;PPBP;PROK2;RNASE2;SAA1;SAA2;SB…	95
Chemokine Receptors	ENSG00000197405;ENSG00000163823;ENSG00000184451;ENSG00000183625;ENSG00000183813;ENSG00000160791;ENSG00000112486;ENSG00000126353;ENSG00000179934;ENSG00000173585;ENSG00000121797;ENSG00000174600;ENSG00000168329;ENSG00000186810;ENSG00000121966;ENSG00000160683;ENSG00000172215;ENSG00000173198;ENSG00000152207;ENSG00000151617;ENSG00000136160;ENSG00000171051;ENSG00000171049;ENSG00000144230;ENSG00000142511…	C5AR1;CCR1;CCR10;CCR3;CCR4;CCR5;CCR6;CCR7;CCR8;CCR9;CCRL2;CMKLR1;CX3CR1;CXCR3;CXCR4;CXCR5;CXCR6;CYSLTR1;CYSLTR2;EDNRA;EDNRB;FPR1;FPR2;GPR17;GPR32;GPR33;LTB4R;LTB4R2;PLAUR;PLXNA1;PLXNA2;PLXNA3;PLXNA4;PLXNB1;PLXNB2;PLXNB3;PLXNC1;PLXND1;PTAFR;ROBO1;ROBO2;ROBO3;RXFP3;XCR1	44
Cytokines	ENSG00000181092;ENSG00000148926;ENSG00000128165;ENSG00000159723;ENSG00000135744;ENSG00000178522;ENSG00000125363;ENSG00000104899;ENSG00000187151;ENSG00000171819;ENSG00000171388;ENSG00000109321;ENSG00000117407;ENSG00000101200;ENSG00000172232;ENSG00000176697;ENSG00000168487;ENSG00000163217;ENSG00000130385;ENSG00000125845;ENSG00000152785;ENSG00000125378;ENSG00000112175;ENSG00000153162;ENSG00000101144…	ADIPOQ;ADM;ADM2;AGRP;AGT;AMBN;AMELX;AMH;ANGPTL5;ANGPTL7;APLN;AREG;ARTN;AVP;AZU1;BDNF;BMP1;BMP10;BMP15;BMP2;BMP3;BMP4;BMP5;BMP6;BMP7;BMP8A;BMP8B;BTC;C3;C5;CALCA;CALCB;CAMP;CAT;CCK;CCL1;CCL11;CCL13;CCL14;CCL15;CCL16;CCL17;CCL18;CCL19;CCL2;CCL20;CCL21;CCL22;CCL23;CCL24;CCL25;CCL26;CCL27;CCL28;CCL3;CCL3L3;CCL4;CCL4L2;CCL5;CCL7;CCL8;CD320;CD40LG;CD70;CECR1;CER1;CGA;CGB1;CGB2;CGB5;CGB7;CGB8;CHGA;CHGB;C…	428
Cytokine Receptors	ENSG00000135503;ENSG00000123612;ENSG00000121989;ENSG00000114739;ENSG00000139567;ENSG00000078549;ENSG00000159346;ENSG00000006831;ENSG00000043591;ENSG00000169252;ENSG00000144891;ENSG00000180772;ENSG00000135409;ENSG00000154188;ENSG00000101280;ENSG00000116194;ENSG00000136859;ENSG00000132855;ENSG00000167772;ENSG00000130812;ENSG00000134817;ENSG00000169083;ENSG00000166148;ENSG00000198049;ENSG00000126895…	ACVR1B;ACVR1C;ACVR2A;ACVR2B;ACVRL1;ADCYAP1R1;ADIPOR1;ADIPOR2;ADRB1;ADRB2;AGTR1;AGTR2;AMHR2;ANGPT1;ANGPT4;ANGPTL1;ANGPTL2;ANGPTL3;ANGPTL4;ANGPTL6;APLNR;AR;AVPR1A;AVPR1B;AVPR2;BMPR1A;BMPR1B;BMPR2;BRD8;C3AR1;C5AR1;CALCR;CALCRL;CCR1;CCR10;CCR3;CCR4;CCR5;CCR6;CCR7;CCR8;CCR9;CCRL2;CD40;CMKLR1;CNTFR;CRHR1;CRHR2;CRIM1;CRLF1;CRLF2;CRLF3;CSF1R;CSF2RA;CSF2RB;CSF3R;CX3CR1;CXCR3;CXCR4;CXCR5;CXCR6;CYSLTR1;CYSL…	294
Interferons	ENSG00000186803;ENSG00000233816;ENSG00000228083;ENSG00000147885;ENSG00000234829;ENSG00000188379;ENSG00000137080;ENSG00000236637;ENSG00000147873;ENSG00000120235;ENSG00000214042;ENSG00000120242;ENSG00000171855;ENSG00000184995;ENSG00000111537;ENSG00000147896;ENSG00000177047	IFNA10;IFNA13;IFNA14;IFNA16;IFNA17;IFNA2;IFNA21;IFNA4;IFNA5;IFNA6;IFNA7;IFNA8;IFNB1;IFNE;IFNG;IFNK;IFNW1	17
Interferon Receptor	ENSG00000159110;ENSG00000027697;ENSG00000159128	IFNAR2;IFNGR1;IFNGR2	3
Interleukins	ENSG00000095752;ENSG00000168811;ENSG00000113302;ENSG00000169194;ENSG00000164136;ENSG00000172349;ENSG00000112115;ENSG00000127743;ENSG00000124391;ENSG00000172458;ENSG00000112116;ENSG00000150782;ENSG00000142224;ENSG00000115008;ENSG00000125538;ENSG00000136697;ENSG00000136689;ENSG00000109471;ENSG00000162891;ENSG00000138684;ENSG00000127318;ENSG00000110944;ENSG00000162892;ENSG00000166090;ENSG00000111536…	IL11;IL12A;IL12B;IL13;IL15;IL16;IL17A;IL17B;IL17C;IL17D;IL17F;IL18;IL19;IL1A;IL1B;IL1F10;IL1RN;IL2;IL20;IL21;IL22;IL23A;IL24;IL25;IL26;IL27;IL3;IL31;IL32;IL33;IL34;IL4;IL5;IL6;IL6ST;IL7;IL9;TXLNA	38
Interleukins Receptor	ENSG00000110324;ENSG00000243646;ENSG00000137070;ENSG00000096996;ENSG00000081985;ENSG00000131724;ENSG00000123496;ENSG00000134470;ENSG00000177663;ENSG00000056736;ENSG00000163702;ENSG00000144730;ENSG00000163701;ENSG00000115604;ENSG00000115607;ENSG00000115594;ENSG00000115590;ENSG00000196083;ENSG00000115602;ENSG00000115598;ENSG00000016402;ENSG00000174564;ENSG00000103522;ENSG00000142677;ENSG00000164485…	IL10RA;IL10RB;IL11RA;IL12RB1;IL12RB2;IL13RA1;IL13RA2;IL15RA;IL17RA;IL17RB;IL17RC;IL17RD;IL17RE;IL18R1;IL18RAP;IL1R1;IL1R2;IL1RAP;IL1RL1;IL1RL2;IL20RA;IL20RB;IL21R;IL22RA1;IL22RA2;IL23R;IL27RA;IL2RA;IL2RB;IL2RG;IL31RA;IL3RA;IL4R;IL5RA;IL6R;IL7R;IL9R	37
Natural Killer Cell Cytotoxicity	ENSG00000206503;ENSG00000234745;ENSG00000204525;ENSG00000204592;ENSG00000204632;ENSG00000167633;ENSG00000240403;ENSG00000125498;ENSG00000243772;ENSG00000189013;ENSG00000134545;ENSG00000205809;ENSG00000205810;ENSG00000134539;ENSG00000111679;ENSG00000179295;ENSG00000090339;ENSG00000108622;ENSG00000005844;ENSG00000160255;ENSG00000120899;ENSG00000134215;ENSG00000141968;ENSG00000160293;ENSG00000136238…	HLA-A;HLA-B;HLA-C;HLA-E;HLA-G;KIR3DL1;KIR3DL2;KIR2DL1;KIR2DL3;KIR2DL4;KLRC1;KLRC2;KLRC3;KLRD1;PTPN6;PTPN11;ICAM1;ICAM2;ITGAL;ITGB2;PTK2B;VAV3;VAV1;VAV2;RAC1;RAC2;RAC3;PAK1;MAP2K1;MAP2K2;MAPK1;MAPK3;TNF;CSF2;IFNG;NCR2;TYROBP;LCK;FCGR3A;FCGR3B;NCR1;NCR3;FCER1G;CD247;ZAP70;SYK;LCP2;LAT;PLCG1;PLCG2;SH3BP2;PIK3CA;PIK3CB;PIK3CD;PIK3CG;PIK3R5;PIK3R1;PIK3R2;PIK3R3;FYN;SHC2;SHC4;SHC3;SHC1;GRB2;SOS1;SOS2;H…	127
TCR signaling Pathway	ENSG00000167286;ENSG00000198851;ENSG00000160654;ENSG00000198821;ENSG00000010610;ENSG00000153563;ENSG00000172116;ENSG00000081237;ENSG00000182866;ENSG00000010810;ENSG00000115085;ENSG00000043462;ENSG00000213658;ENSG00000113263;ENSG00000135605;ENSG00000158092;ENSG00000071051;ENSG00000134215;ENSG00000141968;ENSG00000160293;ENSG00000100351;ENSG00000177885;ENSG00000149269;ENSG00000180370;ENSG00000077264…	CD3D;CD3E;CD3G;CD247;CD4;CD8A;CD8B;PTPRC;LCK;FYN;ZAP70;LCP2;LAT;ITK;TEC;NCK1;NCK2;VAV3;VAV1;VAV2;GRAP2;GRB2;PAK1;PAK2;PAK3;PAK4;PAK6;RHOA;CDC42;PPP3CA;PPP3CB;PPP3CC;PPP3R1;PPP3R2;CHP2;NFAT5;NFATC1;NFATC2;NFATC3;NFATC4;SOS1;SOS2;HRAS;KRAS;NRAS;FOS;JUN;CARD11;BCL10;MALT1;CHUK;IKBKB;IKBKG;NFKB1;RELA;NFKBIA;NFKBIB;NFKBIE;CD28;ICOS;CD40LG;PIK3R5;PIK3R1;PIK3R2;PIK3R3;PIK3CA;PIK3CB;PIK3CD;PIK3CG;AKT3;AK…	92
TGFb Family Member	ENSG00000168487;ENSG00000163217;ENSG00000130385;ENSG00000125845;ENSG00000152785;ENSG00000125378;ENSG00000112175;ENSG00000153162;ENSG00000101144;ENSG00000183682;ENSG00000116985;ENSG00000130283;ENSG00000266524;ENSG00000135414;ENSG00000130513;ENSG00000263761;ENSG00000184344;ENSG00000125965;ENSG00000156466;ENSG00000143869;ENSG00000164404;ENSG00000168621;ENSG00000123999;ENSG00000122641;ENSG00000163083…	BMP1;BMP10;BMP15;BMP2;BMP3;BMP4;BMP5;BMP6;BMP7;BMP8A;BMP8B;GDF1;GDF10;GDF11;GDF15;GDF2;GDF3;GDF5;GDF6;GDF7;GDF9;GDNF;INHA;INHBA;INHBB;INHBC;INHBE;LEFTY1;LEFTY2;NODAL;TGFB1;TGFB2;TGFB3	33
TGFb Family Member Receptor	ENSG00000135503;ENSG00000123612;ENSG00000121989;ENSG00000114739;ENSG00000139567;ENSG00000135409;ENSG00000107779;ENSG00000138696;ENSG00000204217;ENSG00000106799;ENSG00000163513;ENSG00000069702	ACVR1B;ACVR1C;ACVR2A;ACVR2B;ACVRL1;AMHR2;BMPR1A;BMPR1B;BMPR2;TGFBR1;TGFBR2;TGFBR3	12
TNF Family Members	ENSG00000164761;ENSG00000121858;ENSG00000120659;ENSG00000239697;ENSG00000161955;ENSG00000102524;ENSG00000125735;ENSG00000181634;ENSG00000120337;ENSG00000117586;ENSG00000106952;ENSG00000125657	TNFRSF11B;TNFSF10;TNFSF11;TNFSF12;TNFSF13;TNFSF13B;TNFSF14;TNFSF15;TNFSF18;TNFSF4;TNFSF8;TNFSF9	12
TNF Family Members Receptors	ENSG00000120889;ENSG00000173535;ENSG00000173530;ENSG00000141655;ENSG00000006327;ENSG00000240505;ENSG00000159958;ENSG00000157873;ENSG00000048462;ENSG00000186891;ENSG00000127863;ENSG00000067182;ENSG00000028137;ENSG00000146072;ENSG00000215788;ENSG00000186827;ENSG00000243509;ENSG00000120949;ENSG00000049249	TNFRSF10B;TNFRSF10C;TNFRSF10D;TNFRSF11A;TNFRSF12A;TNFRSF13B;TNFRSF13C;TNFRSF14;TNFRSF17;TNFRSF18;TNFRSF19;TNFRSF1A;TNFRSF1B;TNFRSF21;TNFRSF25;TNFRSF4;TNFRSF6B;TNFRSF8;TNFRSF9	19
